# Supplementary material
Source: MDPI journal article supplement (https://www.mdpi.com/2079-6439/5/3/34)
Supplement: s1 [file s1]

**Antimicrobial Electrospun Fibers of Polyester Loaded with Engineered Cyclic Gramicidin Analogues**

**Silvana Maione, Luis J. del Valle, Maria M. Pérez-Madrigal, Carlos Cativiela, Jordi Puiggalí and Carlos Alemán**


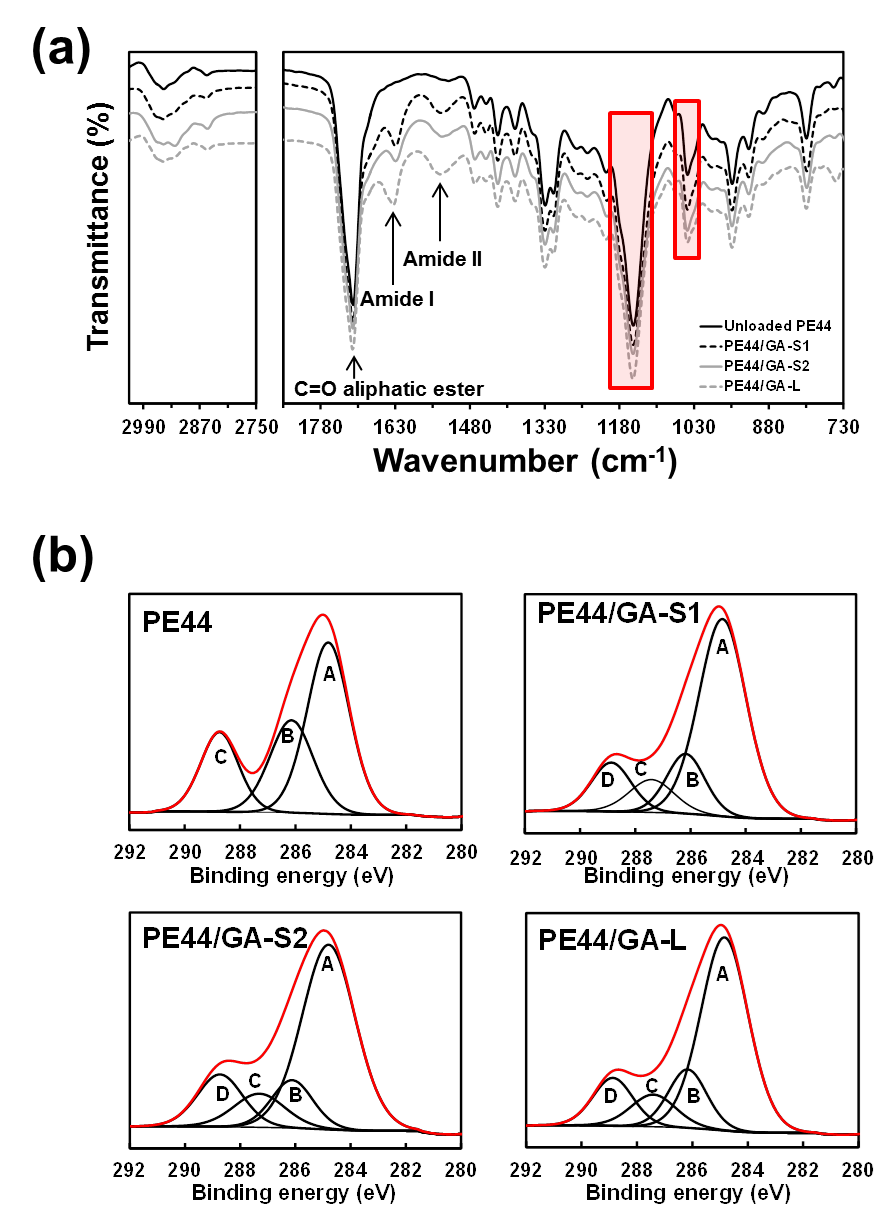


**Figure S1.** FTIR spectra of electrospun unloaded and GA-loaded PE44 fibers. The red rectangles indicate the C–O–C (1150 and 1044 cm-1) vibrations of the ester bond in PE44. The C=O, amide I and amide II bands are explicitly indicated.


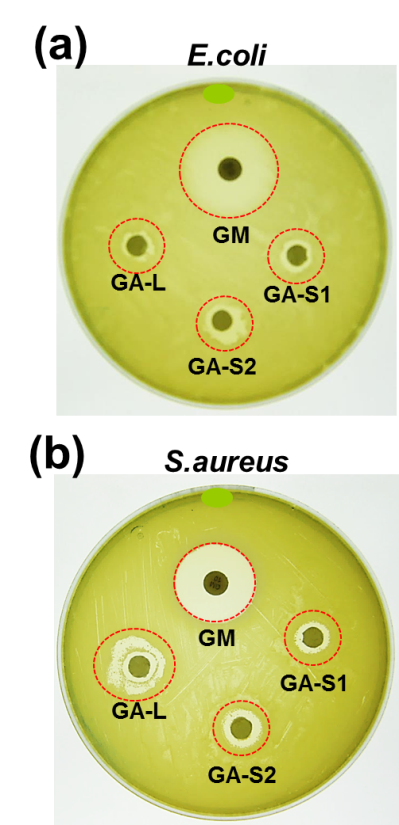

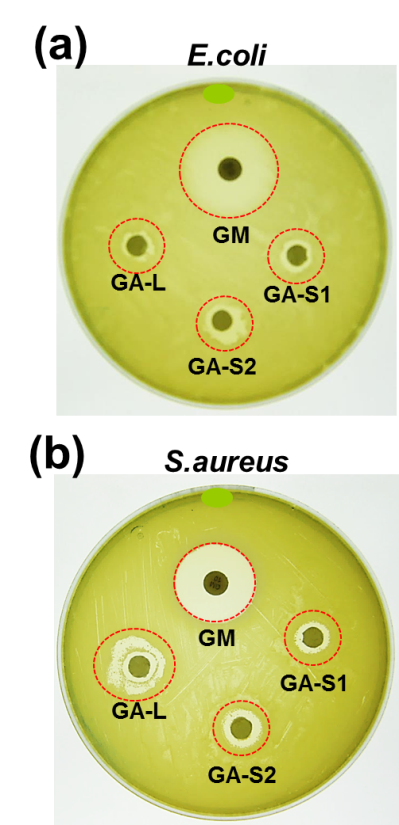


**Figure S2.** (**a**) *E. coli* and (**b**) *S. aureus* bacterial cultures showing the inhibition zones around PE44/GA-S1, PE44/GA-S2, PE44/GA-L and gentamicin (GM, positive control) samples. Unloaded PE44 (not shown) was tested as negative control.
